# Supplementary material
Source: HighWire-hosted journal article supplement (http://jpet.aspetjournals.org/highwire/filestream/156326/field_highwire_adjunct_files/0/2154_supp_table.pdf)
Supplement: 2154_supp_table.pdf [file 2154_supp_table.pdf]

## **KVX-053, a Protein Tyrosine Phosphatase 4A3 inhibitor, ameliorates SARS-CoV-2 Spike protein subunit 1 – induced acute lung injury in mice.**

Pavel A. Solopov, Ruben Manuel Luciano Colunga Biancatelli, Tierney Day, Betsy Gregory, Elizabeth R. Sharlow, John S. Lazo, and John D. Catravas

**The Journal of Pharmacology and Experimental Therapeutics**

Manuscript # JPET-AR-2024-002154R1

### **Supplementary table 1.**

#### List of antibodies

| <b>Antybody</b>                               | <b>Manufacture</b>        | <b>Catalog #</b> |
|-----------------------------------------------|---------------------------|------------------|
| <b>Primary for WB</b>                         |                           |                  |
| STAT3 (78D7) Rabbit mAb                       | Cell Signaling Technology | 4904S            |
| P- STAT3 (Y705) (D3A7) XP (R) Rabbit mAb      | Cell Signaling Technology | 9145S            |
| IKB-alpha Rabbit Ab                           | Cell Signaling Technology | 9242S            |
| P-IKB-alpha (S32) (14D4) Rabbit mAb           | Cell Signaling Technology | 2859S            |
| B-Actin Loading Control mAb (BA3R)            | Invitrogen                | YE372476         |
| VE-Cadherin Rb pAb                            | Abcam                     | Ab33168          |
| <b>Secondary for WB</b>                       |                           |                  |
| IRDye 800CW Goat anti-rabbit IgG Secondary Ab | Li-COR Biosciences        | 926-32211        |
| IRDye 680RD Goat anti-mouse IgG Secondary Ab  | Li-COR Biosciences        | 926-68070        |
| <b>Primary for ICH</b>                        |                           |                  |
| VE-Cadherin Rb pAb                            | Abcam                     | Ab33168          |
| Texas Red-X Phalloidin                        | Invitrogen                | T7471            |
| DAPI                                          | Invitrogen                | 62248            |
| <b>Secondary for ICH</b>                      |                           |                  |
| Alexa Fluor 488 Goat-anty-rabbit Ab           | Invitrogen                | A-11008          |
| <b>Primary for IHH</b>                        |                           |                  |
| PTP4A3 (PRL3) pAb                             | Invitrogen                | YC3863893        |
